# Supplementary material
Source: PubMed Central journal article supplement (PMC2955841)
Supplement: NIHMS231383-supplement-01.pdf [file NIHMS231383-supplement-01.pdf]

## Supplemental Information

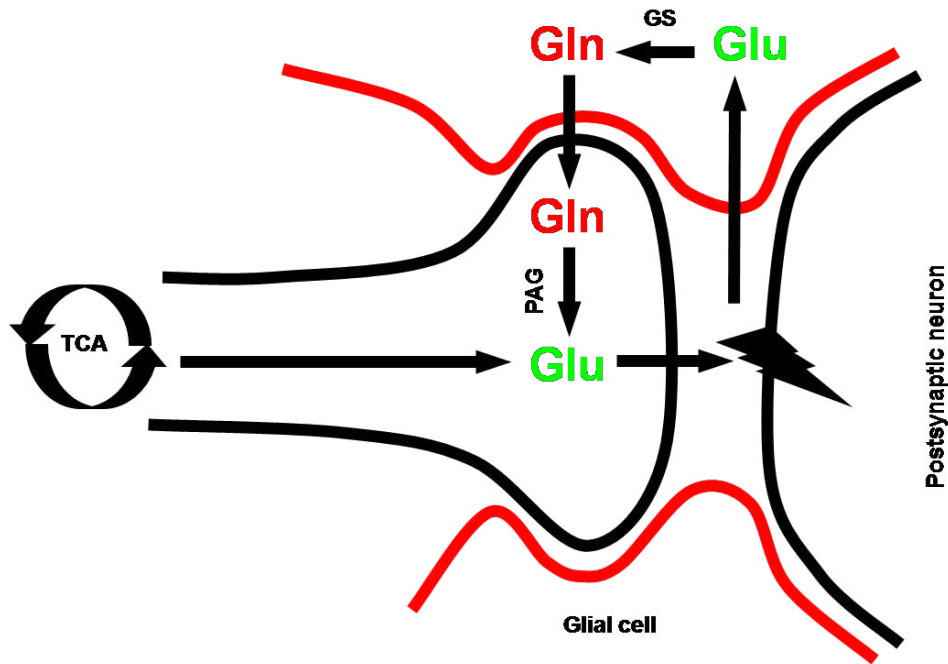

**Figure S1.** Figure depicting glutamate neurotransmission and glutamate-glutamine cycling. Glutamate (Glu) is taken up from the synaptic cleft by astrocytes, converted to Glutamine (Gln) by the astrocyte-specific enzyme Glutamine Synthetase (GS) and subsequently transferred back to the neuron. There, phosphate-activated glutaminase (PAG) converts Gln back to Glu. TCA, tricyclic acid cycle.
